# Supplementary material for: Uncertainty indication in soil function maps – Transparent and easy-to-use information to support sustainable use of soil resources
Source: Copernicus journal article supplement (doi:10.5194/soil-2017-41), 2018-01-31
Supplement: Supplementary file 1 [file soil-2017-41-supplement.pdf]

# **Appendices**

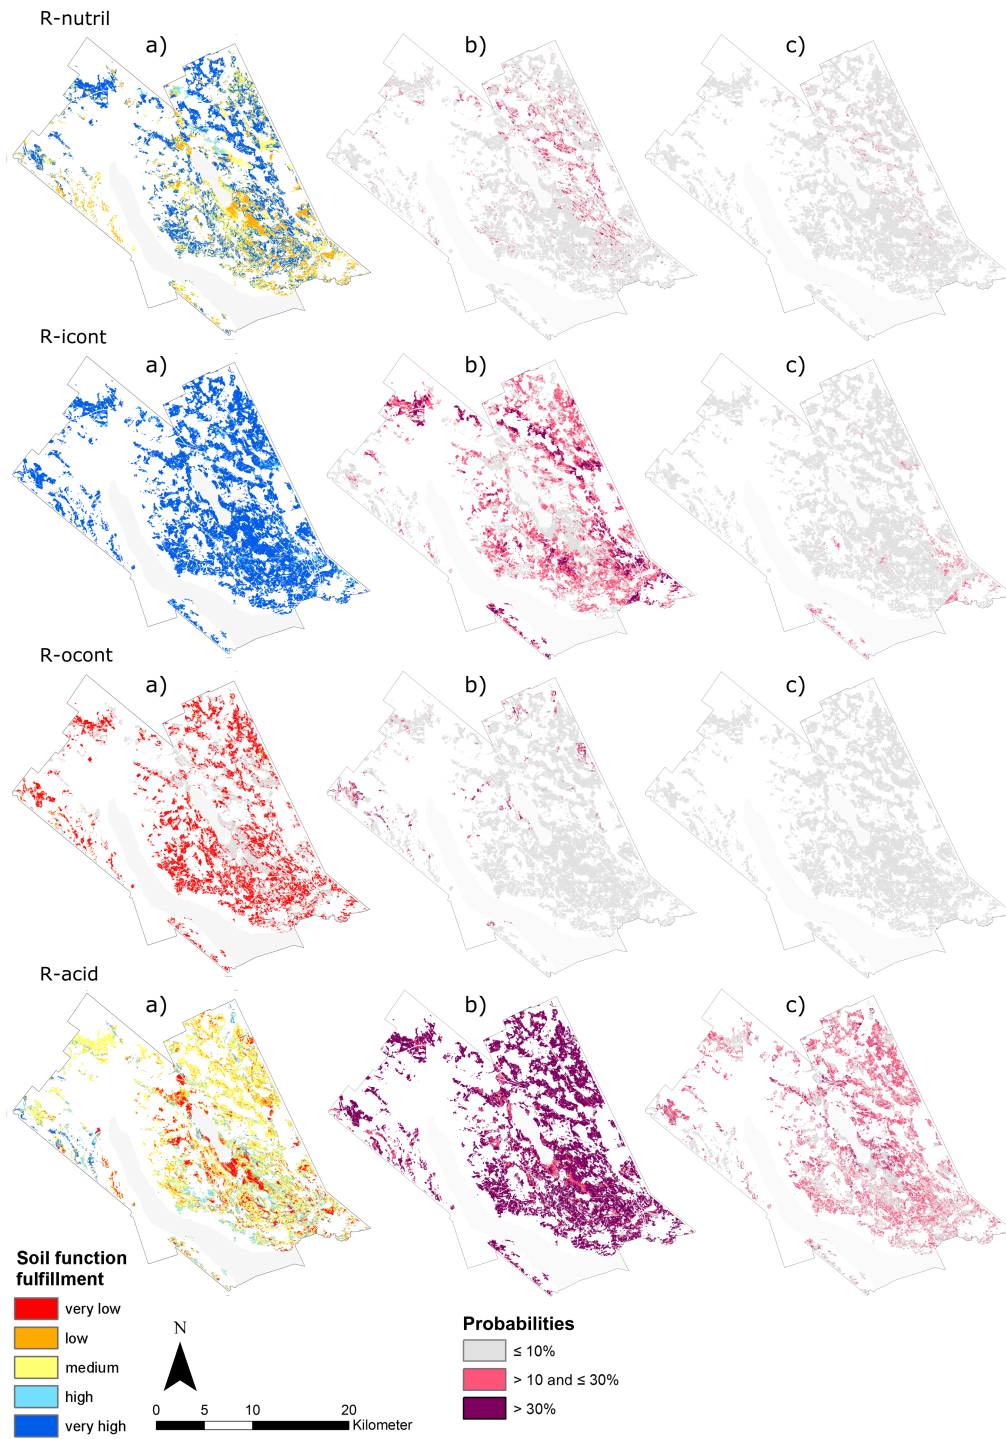

**Figure 1:** Regulation functions maps for the agricultural land of the case study area and indication of their uncertainties in the ordinal scale: a) mean SFF scores and b) probability that the mean SFF score of a raster cell deviates in the ordinal scale for  $\pm 1$  or c)  $\pm 2$  or more SFF units (raster cells  $20 \times 20m$ ,  $N = 1000$  simulations)

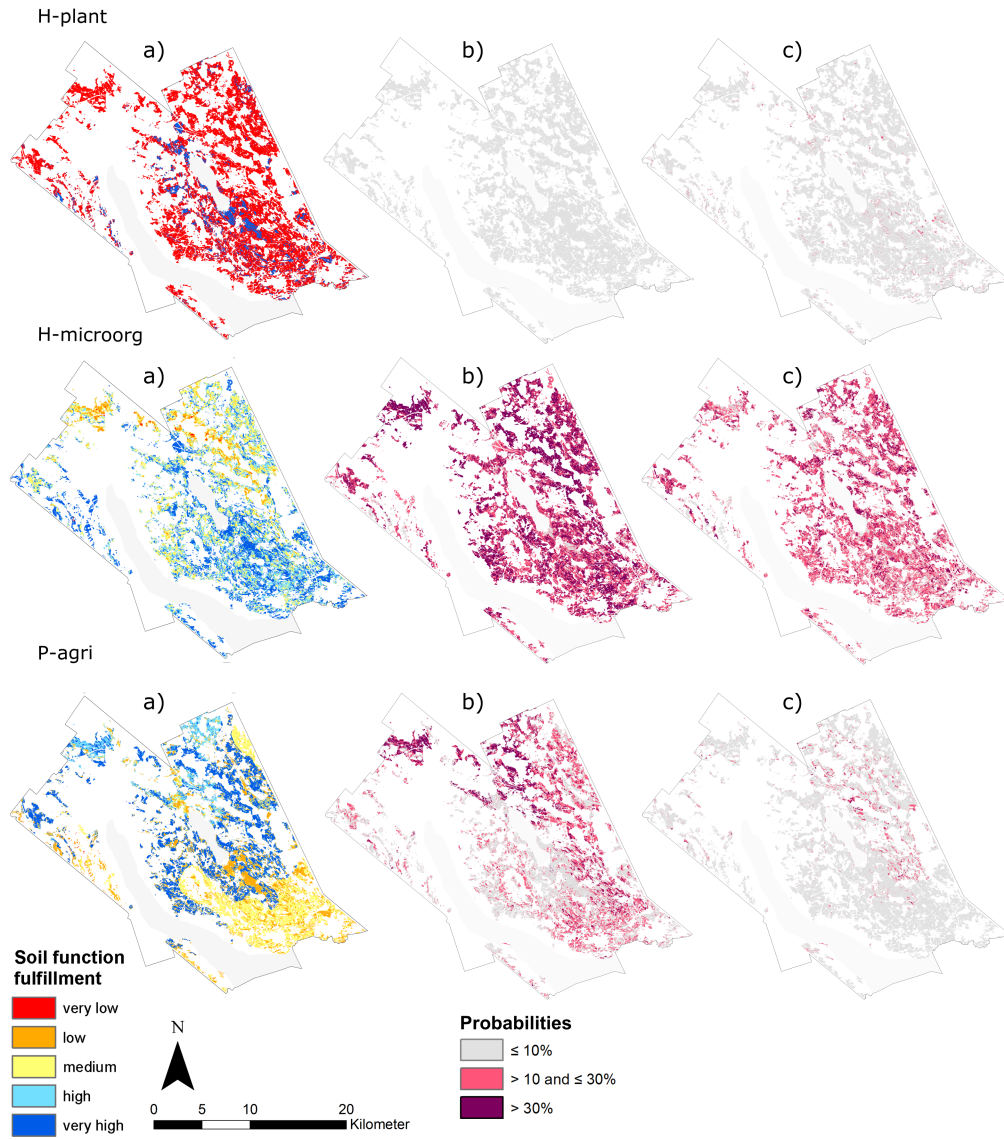

**Figure 2:** Habitat functions and production function maps for the agricultural land of the case study area and indication of their uncertainties in the ordinal scale: a) mean SFF scores and b) probability that the mean SFF score of a raster cell deviates in the ordinal scale for  $\pm 1$  or c)  $\pm 2$  or more SFF units (raster cells  $20 \times 20m$ ,  $N = 1000$  simulations).
